# Supplementary material for: Sandbur Drought Tolerance Reflects Phenotypic Plasticity Based on the Accumulation of Sugars, Lipids, and Flavonoid Intermediates and the Scavenging of Reactive Oxygen Species in the Root
Source: MDPI journal article supplement (doi:10.3390/ijms222312615), 2021-11-23
Supplement: s1 [file s1]

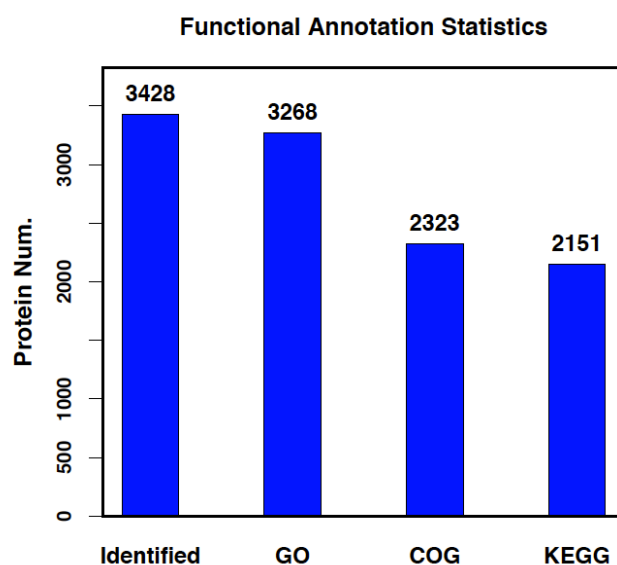

**Figure S1.** Functional annotation of proteins differing in abundance between *C. spinifex* roots under normal and drought stress conditions as revealed in the iTRAQ dataset based on GO categories, COGs and KEGG pathways.

**Table S2.** Unique primers for nine candidate genes amplified by real-time PCR.

| Gene Specific Primer Name | Primer               |
|---------------------------|----------------------|
| Rp S3a-F                  | TCTTCAGAGTGATGAAGATC |
| Rp S4-F                   | ATCTTCTGGTCCTCACAAGT |
| Rp S7-F                   | TCAGATACCGTTTGGATGGT |
| Rp S15a-1-F               | ATGGTGAGAGTCAGCGTCCT |
| Rp S19-F                  | AGATGGTTGGCCACTACCTC |
| Rp L4-1-F                 | CGAGAGTGCCTTCAAGAAGC |
| Rp L10-F                  | ACCCATACCGTAGGTGAAGG |
| Initiation factor-F       | ATTAACCAGGGAGACATCAT |
| ABC transporter-F         | ATACAAGGCAGCTGTTGAGG |
| Actin-F                   | TTCCATTGTCACATACAAG  |
| Rp S3a-R                  | AGTGGTCTTCACATCAACAT |

---

|                     |                      |
|---------------------|----------------------|
| Rp S4-R             | GTGTCATACAGAAGCCTGTA |
| Rp S7-R             | AGACCTTCACTGCAGTCTAC |
| Rp S15a-1-R         | CTCCCATTCAACTCAACCAC |
| Rp S19-R            | TTCATGCGTCACCAAGTCAT |
| Rp L4-1-R           | TCATACCGGGCTAAGCTTGG |
| Rp L10-R            | ATGTCCCAGCTGGAAACA   |
| Initiation factor-R | GCAAATCGGCTTGACTAGAT |
| ABC transporter-R   | GTTGCATTACCTAACGACAT |
| Actin-R             | AATCTGTAGCAAATGGCTGA |

---
